# Supplementary material for: Reversible thermo-responsive luminescent metallo-supramolecular triblock copolymers based on platinum(ii) terpyridyl chromophores with unusual aggregation behaviour and red-near-infrared (NIR) emission upon heating
Source: Royal Society of Chemistry journal article supplement (doi:10.1039/c1dt10741k), 2011-01-01
Supplement: c1dt10741k.pdf [file c1dt10741k.pdf]

**Reversible Thermo-Responsive Luminescent Metallo-Supramolecular Triblock Copolymers Based on Platinum(II) Terpyridyl Chromophores with Unusual Aggregation Behaviour and Red-Near-Infrared (NIR) Emission Upon Heating**

*Yongchen Hu, Kenneth Hoi-Yiu Chan, Clive Yik-Sham Chung and Vivian Wing-Wah Yam\**

Institute of Molecular Functional Materials,<sup>†</sup> and Department of Chemistry, the University of Hong Kong, Pokfulam Road, Hong Kong, P. R. China

<sup>†</sup> Areas of Excellence Scheme, University Grants Committee (Hong Kong)

**Supporting Information**

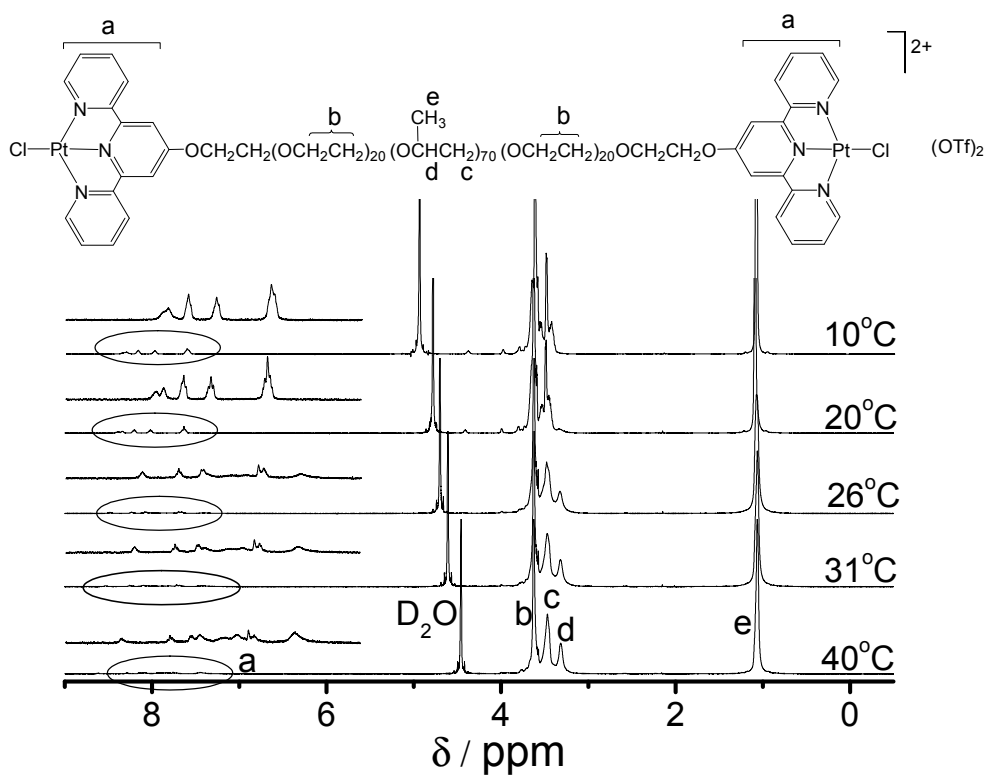

**Fig. S1** <sup>1</sup>H NMR spectra of **1** in D<sub>2</sub>O (1 wt %) at various temperatures

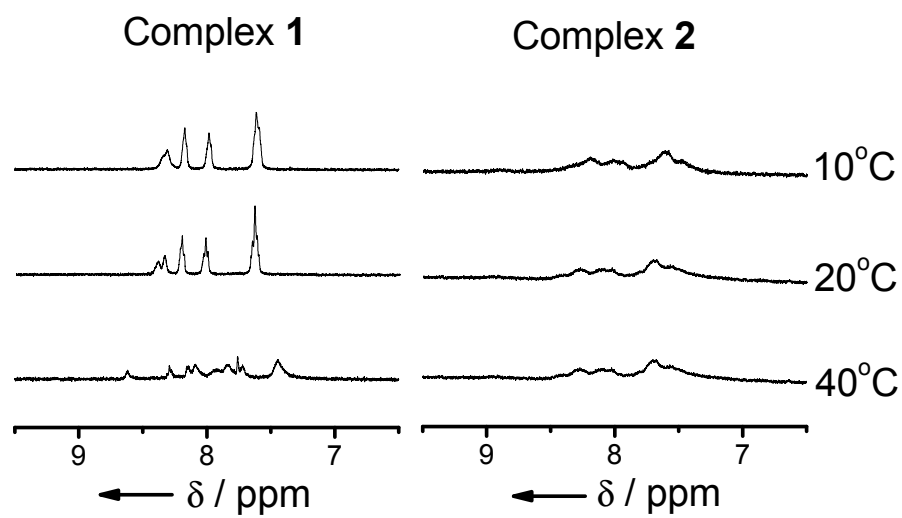

**Fig. S2** <sup>1</sup>H NMR spectra of the terpyridyl protons of complexes **1** and **2** in D<sub>2</sub>O (1 wt %) at various temperatures

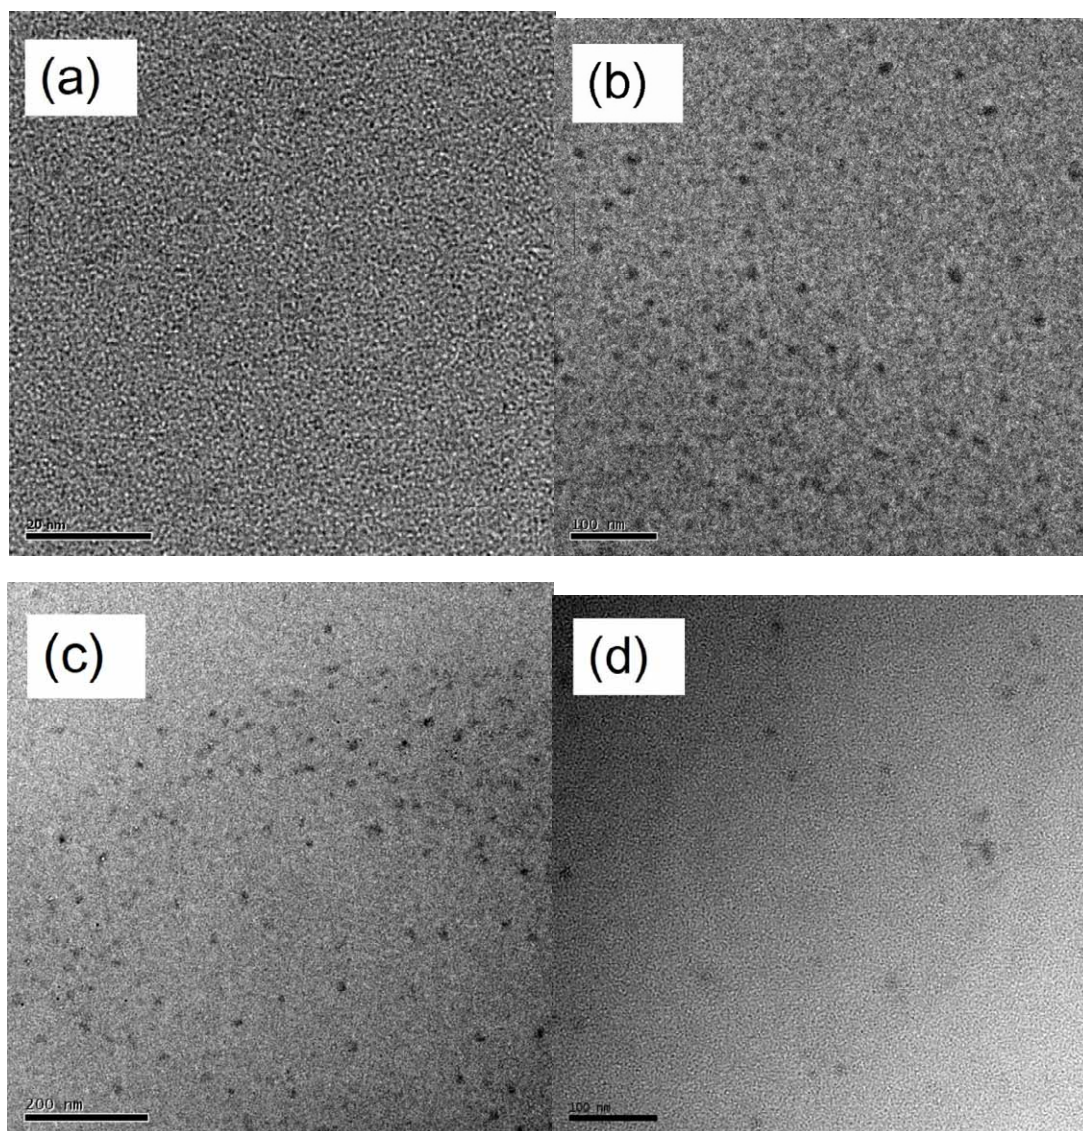

**Fig. S3** TEM images of an aqueous solution of **1** ( $1.0 \text{ mg mL}^{-1}$ ) at (a)  $20 \text{ }^\circ\text{C}$ , (b)  $30 \text{ }^\circ\text{C}$  and (c)  $50 \text{ }^\circ\text{C}$  respectively. (d) TEM image of an aqueous solution of **2** ( $1.0 \text{ mg mL}^{-1}$ ) at  $30 \text{ }^\circ\text{C}$

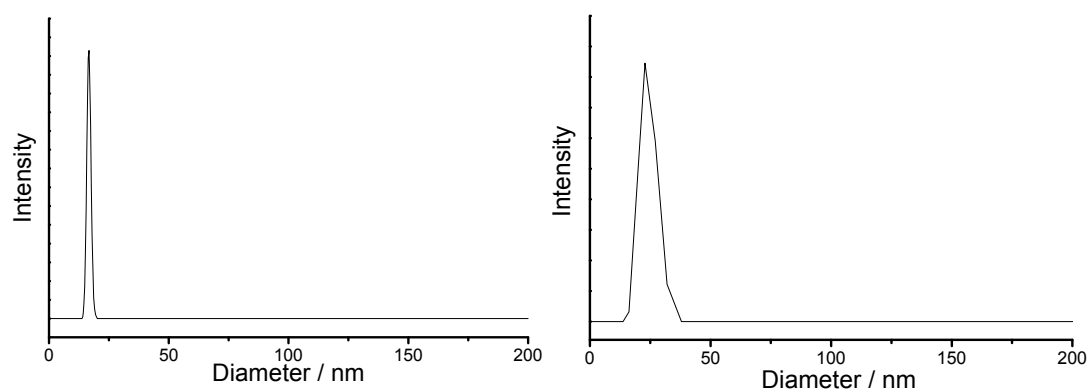

**Fig. S4** Dynamic light scattering (DLS) experiments of an aqueous solution of **1** (left) and **2** (right) at 25 °C, with concentration = 1.0 mg mL<sup>-1</sup>. The intensity-averaged hydrodynamic micelle diameter of **1** and **2** at 25 °C were found to be 16.7 and 23.8 nm respectively.
